# Supplementary material
Source: publisher figshare collection journal article supplement (https://acs.figshare.com/ndownloader/files/15250856)
Supplement: Supplementary file 1 [file 15250856]

## Supporting Information

# **Transformation of Santonin to a Naproxen Analogue with Anti-Inflammatory Activity**

Rohit Singh,<sup>†,‡,□</sup> Kapil Mandrah,<sup>‡,§,□</sup> Ankita Asati,<sup>‡,§</sup> Devendra K. Patel,<sup>‡,§</sup> Bharat Goel,<sup>∇</sup> Ram A. Vishwakarma,<sup>†,‡</sup> Somendu K. Roy,<sup>\*,‡,§</sup> and Shreyans K. Jain<sup>\*,†,∇</sup>

<sup>†</sup>Medicinal Chemistry Division and Natural Product Chemistry Division, Indian Institute of Integrative Medicine (CSIR), Canal Road, Jammu-180001, India

<sup>‡</sup>Academy of Scientific & Innovative Research (AcSIR), at CSIR-IIIM, Jammu and CSIR-IITR, Lucknow

<sup>§</sup>Analytical Chemistry Laboratory, Regulatory Toxicology, Indian Institute of Toxicology Research (CSIR), Vishvigyan Bhavan 31, Mahatma Gandhi Marg, Lucknow-226001, Uttar Pradesh, India

<sup>∇</sup>Department of Pharmaceutical Engineering and Technology, Indian Institute of Technology (BHU), Varanasi 221005, Uttar Pradesh, India

## **CONTENTS**

|            |                                                                    |
|------------|--------------------------------------------------------------------|
| <b>S1</b>  | Mass Spectrum of <b>2</b>                                          |
| <b>S2</b>  | $^1\text{H}$ NMR Spectrum of <b>2</b> in $\text{CD}_3\text{OD}$    |
| <b>S3</b>  | $^{13}\text{C}$ NMR Spectrum of <b>2</b> in $\text{CD}_3\text{OD}$ |
| <b>S4</b>  | DEPT-135 Spectrum of <b>2</b> in $\text{CD}_3\text{OD}$            |
| <b>S5</b>  | COSY Spectrum of <b>2</b> in $\text{CD}_3\text{OD}$                |
| <b>S6</b>  | HSQC Spectrum of <b>2</b> in $\text{CD}_3\text{OD}$                |
| <b>S7</b>  | HMBC Spectrum of <b>2</b> in $\text{CD}_3\text{OD}$                |
| <b>S8</b>  | NOESY Spectrum of <b>2</b> in $\text{CD}_3\text{OD}$               |
| <b>S9</b>  | <i>In vitro</i> COX-1 and COX-2 inhibition assay test result       |
| <b>S10</b> | $^1\text{H}$ NMR Spectrum of <b>1</b> in $\text{CDCl}_3$           |
| <b>S11</b> | $^{13}\text{C}$ NMR Spectrum of <b>1</b> in $\text{CDCl}_3$        |
| <b>S12</b> | DEPT-135 Spectrum of <b>1</b> in $\text{CDCl}_3$                   |
| <b>S13</b> | Mass spectrum of <b>1</b>                                          |
| <b>S14</b> | Notes                                                              |
| <b>S15</b> | Authors contributions                                              |
| <b>S16</b> | References                                                         |

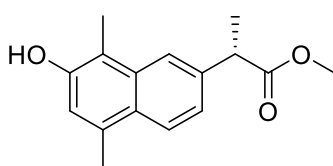

methyl (S)-2-(7-hydroxy-5,8-dimethylnaphthalen-2-yl)propanoate

Compound **2** was a light brown gummy solid;  $^1\text{H}$  NMR (400 MHz, methanol- $d_4$ )  $\delta$  7.82 (d,  $J = 8.8$  Hz, 1H), 7.76 (d,  $J = 1.6$  Hz, 1H), 7.23 (dd,  $J = 8.5, 1.6$  Hz, 1H), 6.96 (s, 1H), 3.91 (q,  $J = 14.2, 7.2$  Hz, 1H), 3.64 (s, 3H), 2.55 (s, 3H), 2.45 (s, 3H), 1.54 (d,  $J = 7.2$  Hz, 3H).  $^{13}\text{C}$  NMR (100 MHz, methanol- $d_4$ )  $\delta$  177.1, 152.9, 139.1, 135.8, 134.1, 128.3, 125.9, 122.9, 122.7, 119.6, 114.2, 52.5, 46.8, 19.2, 19.0, 10.5. ESI-MS:  $m/z$  259.65  $[\text{M}+\text{H}]^+$ ; HRMS:  $m/z$  259.1338 calculated for  $\text{C}_{16}\text{H}_{19}\text{O}_3+\text{H}^+$  (259.1334).

## S1. Mass Spectrum of 2

### Qualitative Compound Report

Data File: RJ-P-3.d Sample Name: RJ-P-3  
Sample Type: Sample Position: Vial 29  
Instrument Name: Instrument 1 User Name:  
Acq Method: vishal\_12-01-13.m Acquired Time: 19-04-2018 PM 5:03:41  
IRM Calibration Status: Success DA Method: Default.m  
Comment:

Sample Group: Info.  
Acquisition SW: 6200 series TOF/6500 series  
Version: Q-TOF B.05.01 (B5125)

#### Compound Table

| Compound Label     | RT  | Mass     | Formula    | MFG Formula | MFG Diff (ppm) | DB Formula |
|--------------------|-----|----------|------------|-------------|----------------|------------|
| Cpd 47: C16 H18 O3 | 0.3 | 258.1265 | C16 H18 O3 | C16 H18 O3  | -3.45          | C16 H18 O3 |

| Compound Label     | m/z      | RT  | Algorithm                 | Mass     |
|--------------------|----------|-----|---------------------------|----------|
| Cpd 47: C16 H18 O3 | 259.1338 | 0.3 | Find by Molecular Feature | 258.1265 |

#### MFE MS Spectrum

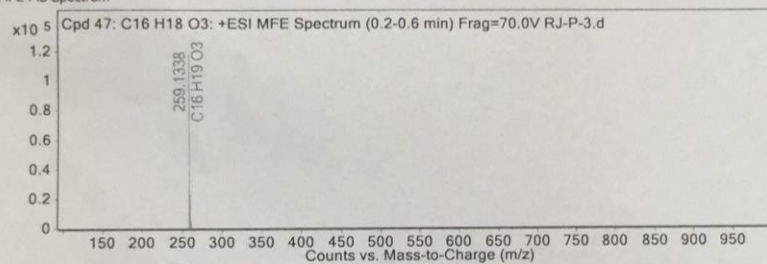

#### MS Spectrum Peak List

| m/z      | z | Abund     | Formula    | Ion    |
|----------|---|-----------|------------|--------|
| 259.1338 | 1 | 117846.28 | C16 H19 O3 | (M+H)+ |
| 260.1372 | 1 | 23532.27  | C16 H19 O3 | (M+H)+ |
| 261.1384 | 1 | 5484.25   | C16 H19 O3 | (M+H)+ |

#### Predicted Isotope Match Table

| Isotope | m/z      | Calc m/z | Diff (ppm) | Abund % | Calc Abund % | Abund Sum % | Calc Abund Sum % |
|---------|----------|----------|------------|---------|--------------|-------------|------------------|
| 1       | 259.1338 | 259.1329 | -3.66      | 100     | 100          | 80.24       | 83.53            |
| 2       | 260.1372 | 260.1363 | -3.48      | 19.97   | 17.64        | 16.02       | 14.73            |
| 3       | 261.1384 | 261.1389 | 1.79       | 4.65    | 2.08         | 3.73        | 1.74             |

--- End Of Report ---

**S2.**  $^1\text{H}$  NMR Spectrum of **2** in  $\text{CD}_3\text{OD}$

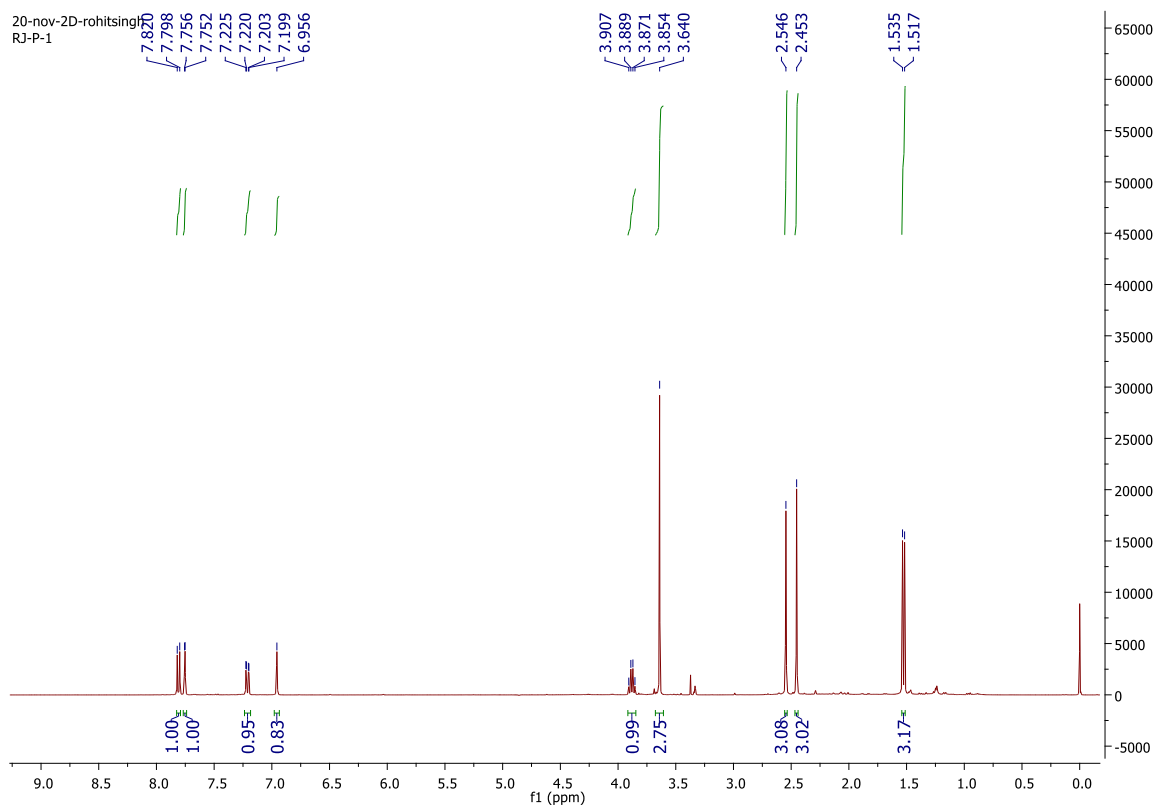

**S3.**  $^{13}\text{C}$  NMR Spectrum of **2** in  $\text{CD}_3\text{OD}$

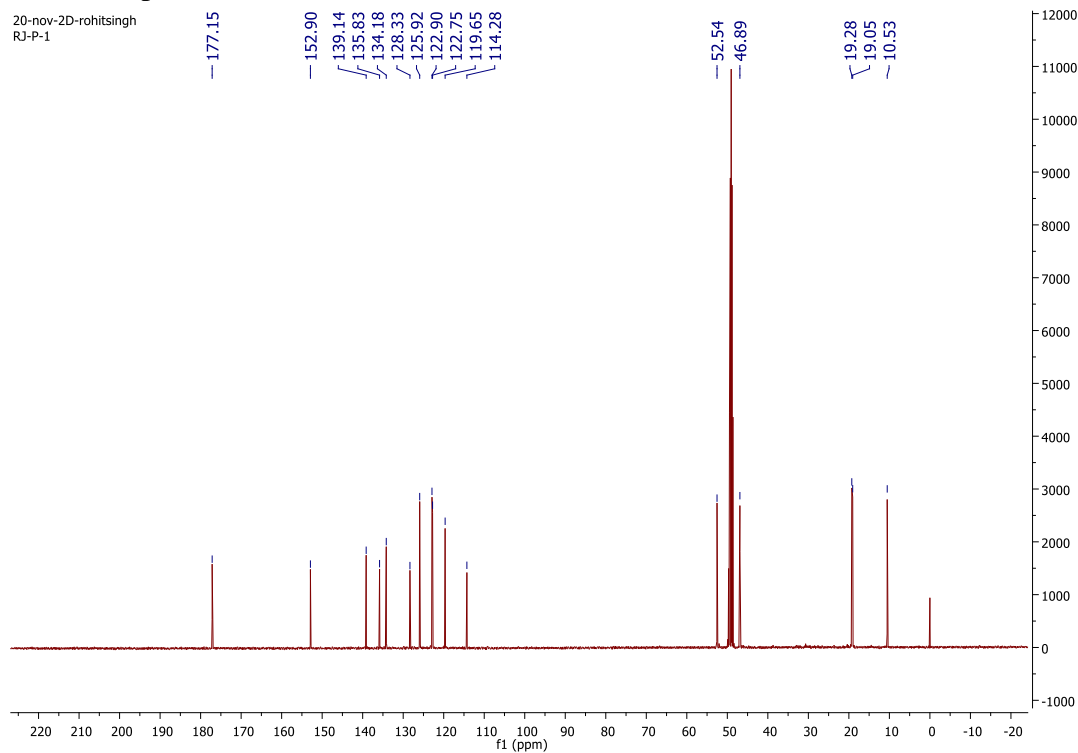

**S4.** DEPT-135 Spectrum of **2** in  $\text{CD}_3\text{OD}$

16-may-c13-sorav  
RJ-P-1

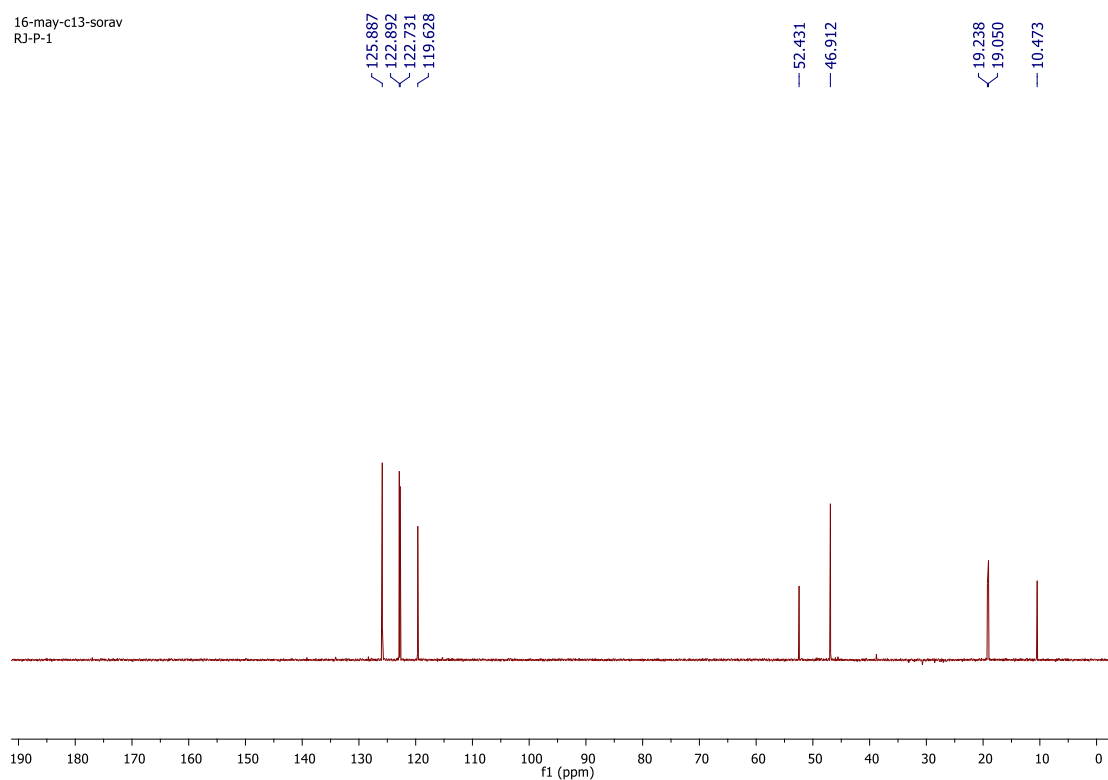

**S5.** COSY Spectrum of **2** in CD<sub>3</sub>OD

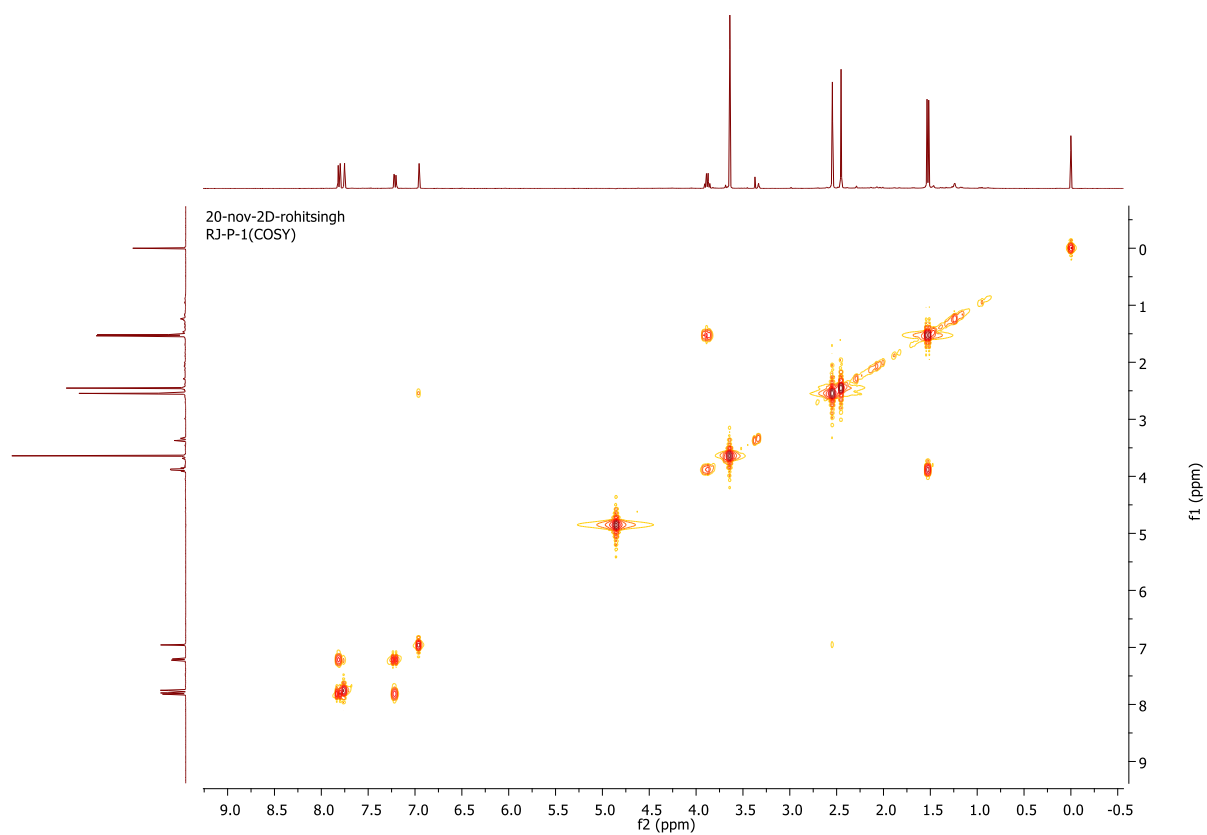

**S6.** HSQC Spectrum of **2** in CD<sub>3</sub>OD

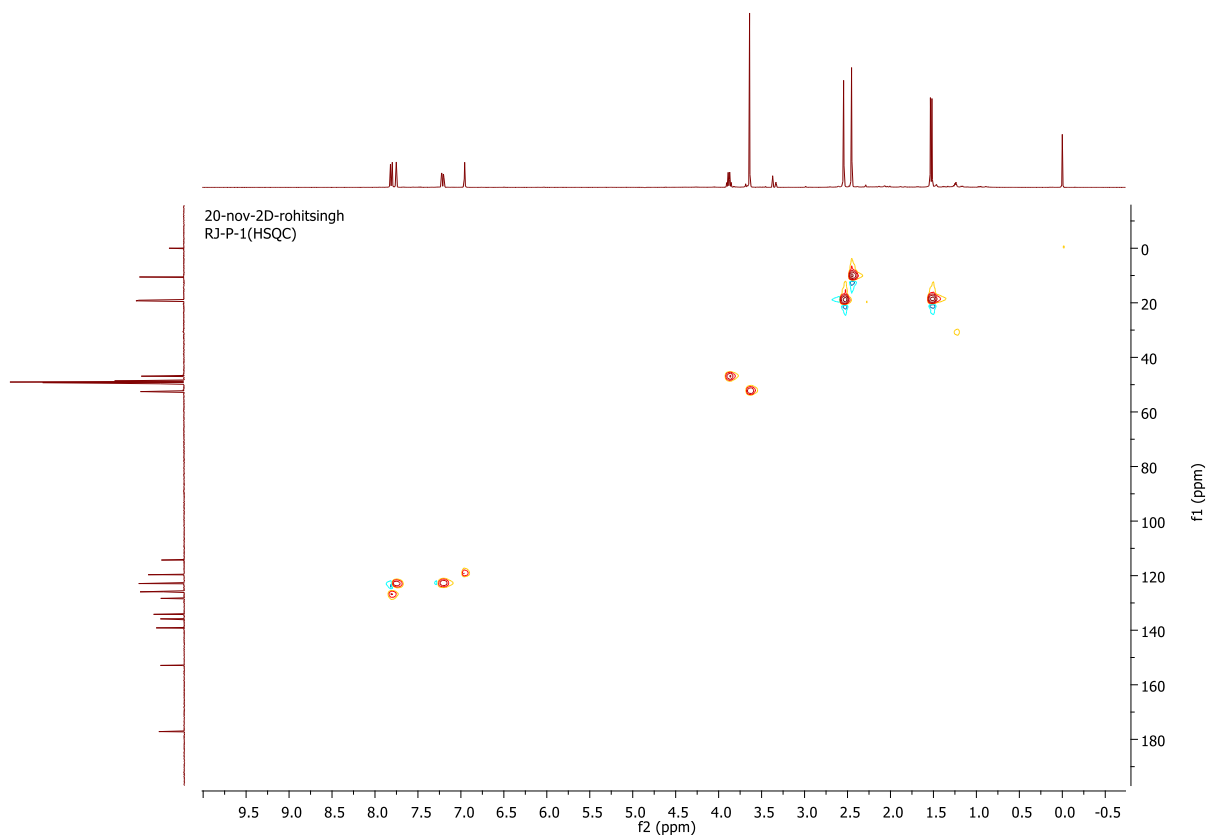

**S7.** HMBC spectrum of **2** in CD<sub>3</sub>OD

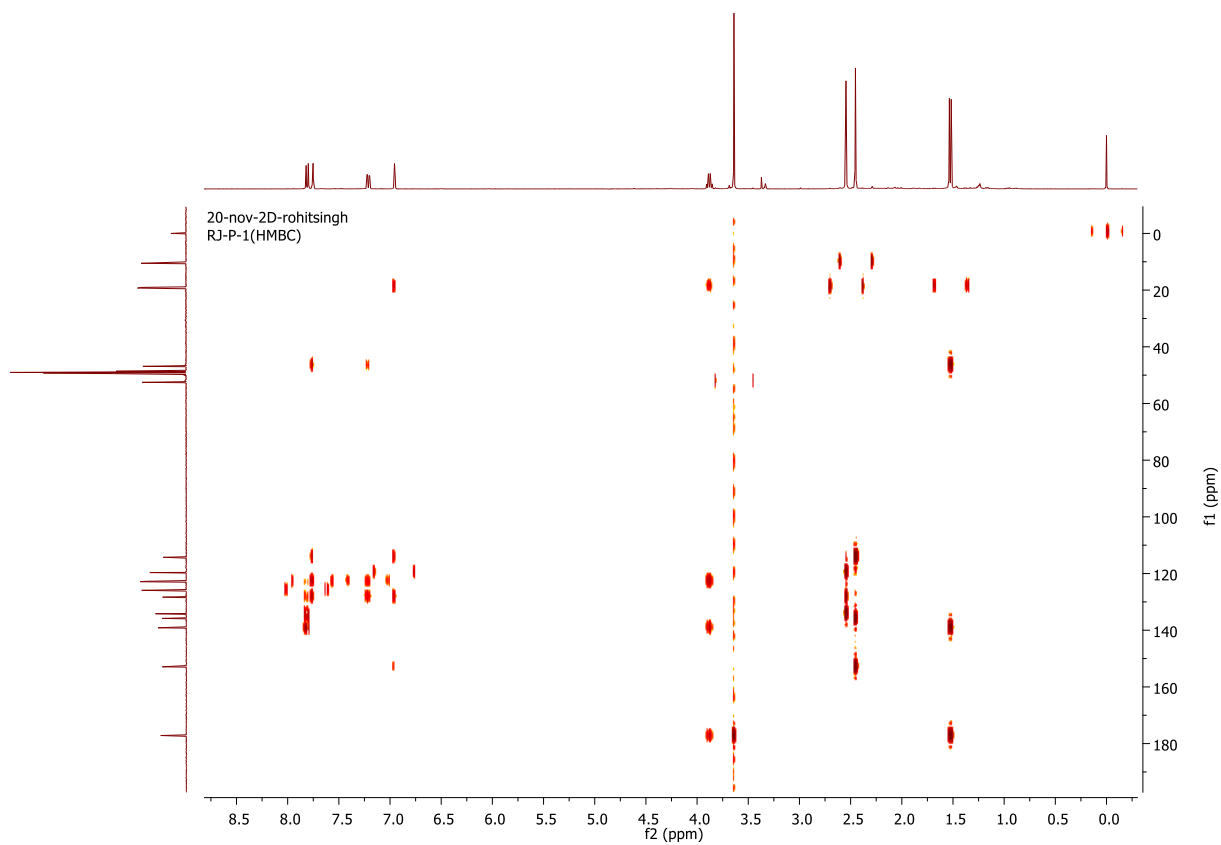

**S8.** NOESY spectrum of **2** in CD<sub>3</sub>OD

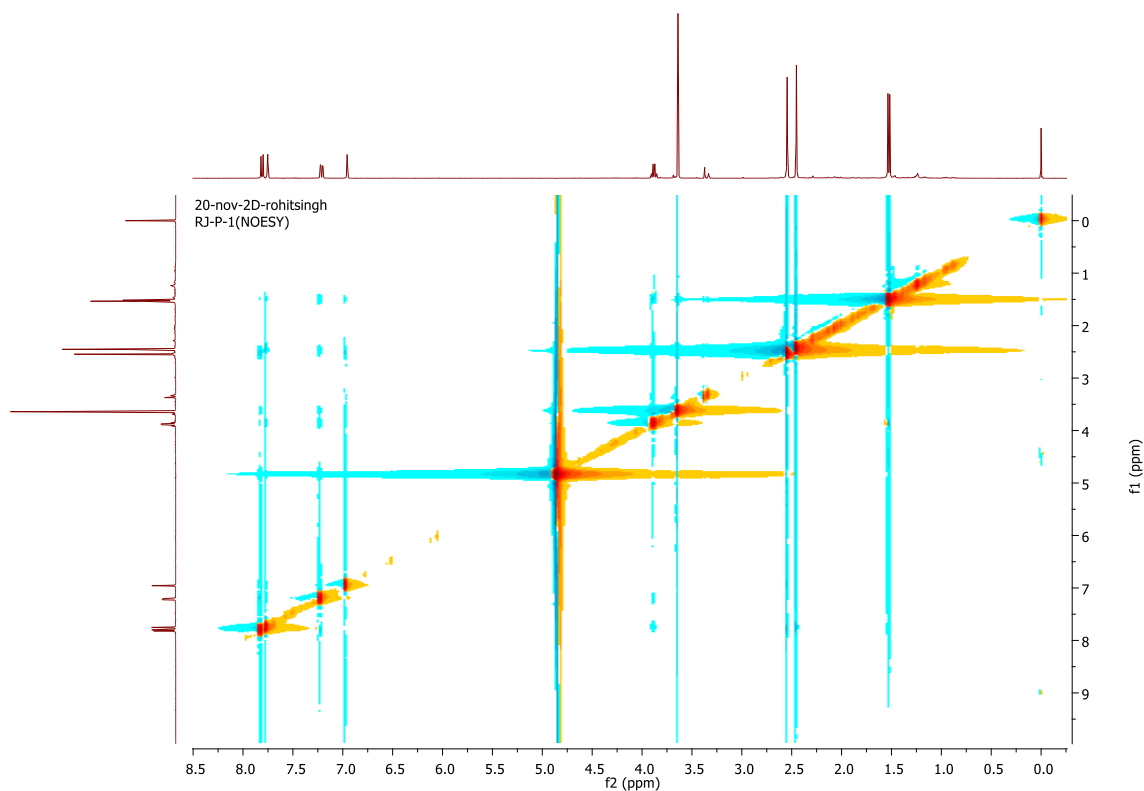

### S9. *In vitro* COX-1 and COX-2 inhibition assay test result

| Compound     | % of COX inhibition at 30 $\mu$ M |                         | COX inhibition (IC <sub>50</sub> ) |       | Selectivity* |
|--------------|-----------------------------------|-------------------------|------------------------------------|-------|--------------|
|              | COX-1                             | COX-2                   | COX-1                              | COX-2 |              |
| <b>2</b>     | 52.98 $\pm$ 4.62 (8.73)           | 21.85 $\pm$ 1.37 (6.26) | 31.02                              | 66.13 | 0.496        |
| Indomethacin | 44.38 $\pm$ 7.44 (16.77)          | -                       |                                    |       |              |
| Etricoxib    | -                                 | 59.47 $\pm$ 2.13 (3.59) |                                    |       |              |
| Naproxen     | 38.30 $\pm$ 0.49 (1.29)           | 24.16 $\pm$ 1.06 (4.42) |                                    |       |              |

\*The selectivity of compound may be determined based on the ratio of their IC<sub>50</sub> values as described for other study.<sup>1</sup>



**S10.**  $^1\text{H}$  NMR Spectrum of **1** in  $\text{CDCl}_3$

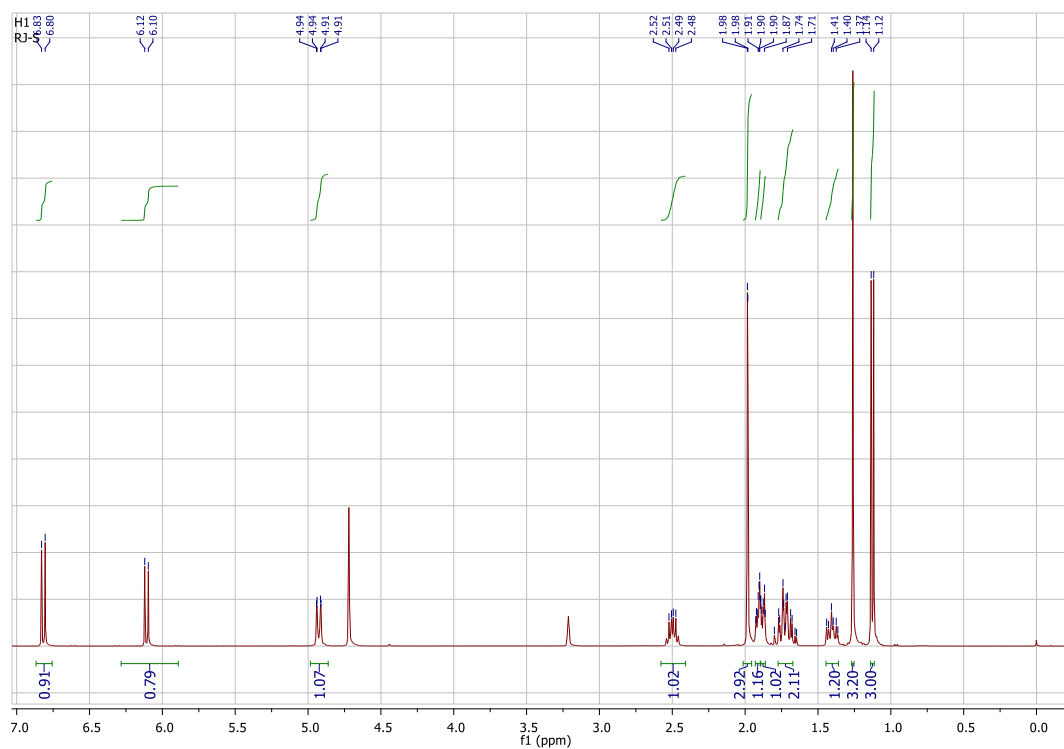

**S11.**  $^{13}\text{C}$  NMR Spectrum of **1** in  $\text{CDCl}_3$

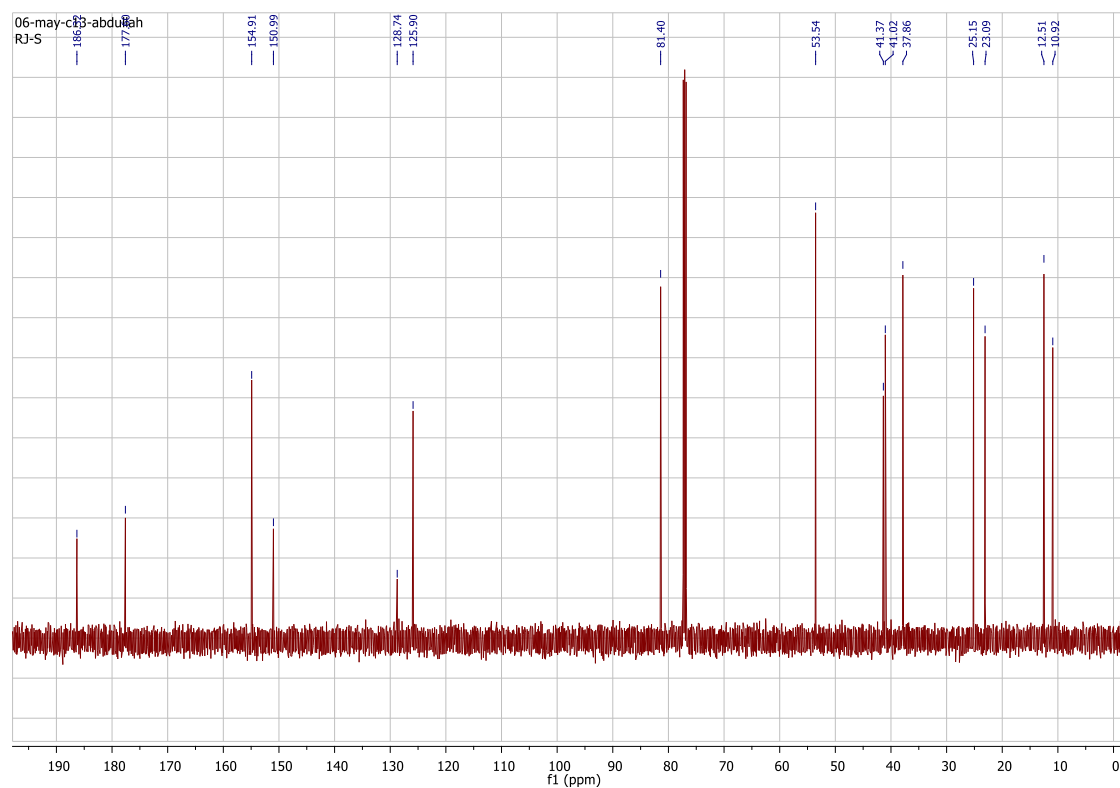

### S12. DEPT 135 Spectrum of **1** in CDCl<sub>3</sub>

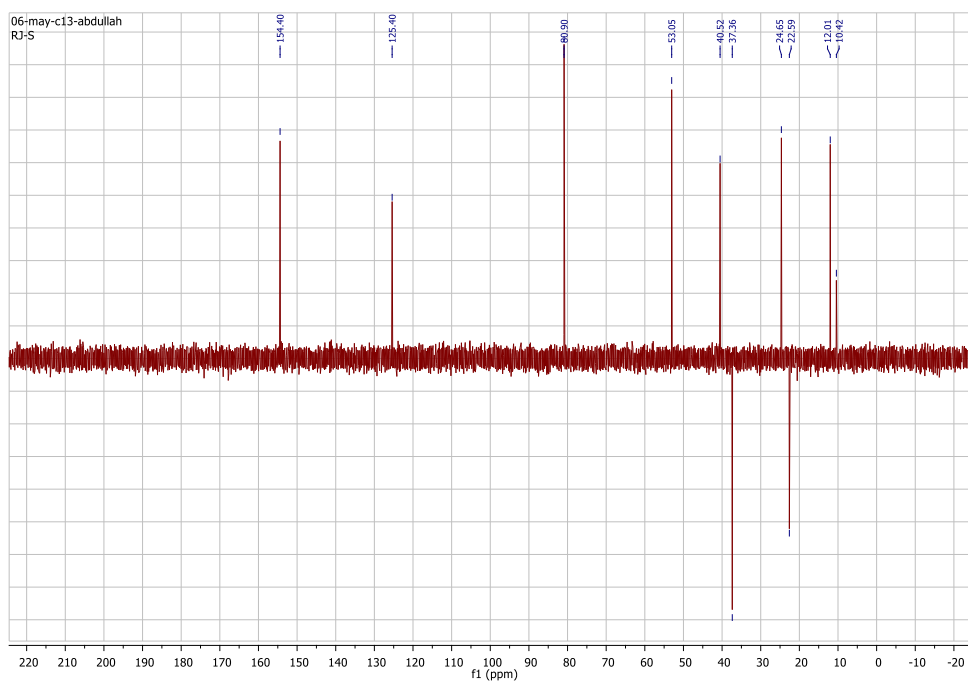

### S13. Mass spectrum of **1**

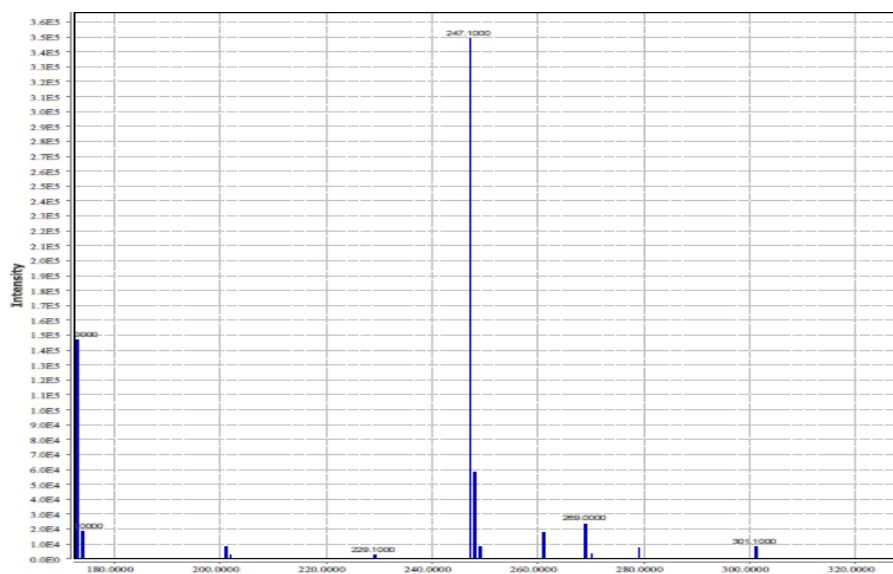

### S14. Notes

#### Publication no:

CSIR-IIIM Communication number: IIIM/2205/2018

CSIR-IITR Communication number: 3551

### **S15. Authors contributions**

S.K.J., R.A.V. and S.K.R. designed, executed, and coordinated this whole study; R.S. and S.K.J. designed and executed initial experiment and optimization of chemical modification. S.K.R. designed the biological experiments. K.M. executed anti-inflammatory experiments. A.A. and D.K.P. designed and developed method for LCMS. B.G. scaled up both santonin and analogue in grams quantity. Manuscript written by S.K.J. and S.K.R.

### **S16. References**

- (1) Cao, H.; Yu, R.; Tao, Y.; Nikolic, D.; van Breemen, R. B. *J. Pharm. Biomed. Anal.* **2011**, *54*, 230-235.
